# Supplementary material for: Efficient Synthesis of Peptide and Protein Functionalized Pyrrole-Imidazole Polyamides Using Native Chemical Ligation
Source: MDPI journal article supplement (doi:10.3390/ijms160612631), 2015-06-04
Supplement: s1 [file s1]

## Supplementary Information

Fluorescence intensity evaluation of eCFP before and after conjugation to Cys-Py-Im-polyamide.

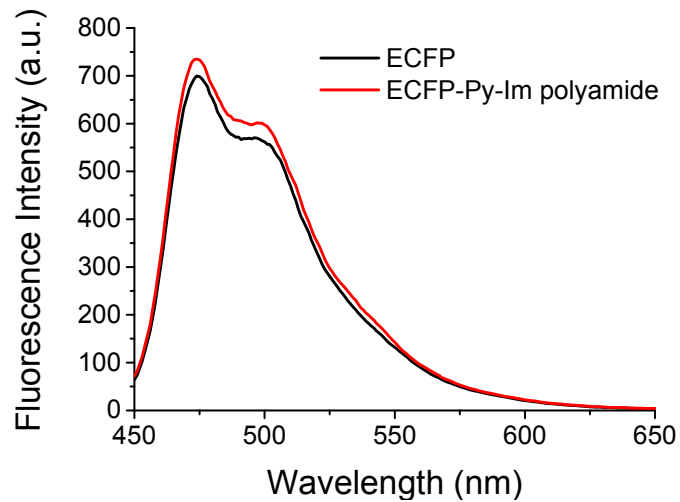

**Figure S1.** Fluorescence emission spectra ( $\lambda_{\text{ex}} = 420$  nm) of 500 nM non-conjugated ECFP (black) and ECFP-Py-Im polyamide (red). Measurements were performed in 10 mM PBS-buffer pH 7.4 containing  $1 \text{ mg} \cdot \text{mL}^{-1}$  BSA at room temperature. These data show that the fluorescence intensity of the fluorescent protein is not affected by the conjugation of Py-Im polyamide.
